# Supplementary material for: Combined Therapy with a CCR2/CCR5 Antagonist and FGF21 Analogue Synergizes in Ameliorating Steatohepatitis and Fibrosis
Source: MDPI journal article supplement (doi:10.3390/ijms23126696), 2022-06-15
Supplement: s1 [file s1]

**Supplementary Table S4.** Genes and primers used for real-time qPCR on mouse liver tissue

| NCBI<br>Gene<br>ID | Gene                                           | Abbreviation  | Forward primer                | Reverse primer                  | Role              |
|--------------------|------------------------------------------------|---------------|-------------------------------|---------------------------------|-------------------|
| 14433              | Glyceraldehyde-3-phosphate dehydrogenase       | GAPDH         | CATGGCCTTCCGT<br>GTTCTTA      | GCGGCACGTCA<br>GATCCA           | Housekeeping gene |
| 15452              | Hypoxanthine-guanine phosphoribosyltransferase | HPRT          | GTAAAGCAGTACA<br>GCCCAAA      | AGGGCATATCC<br>AACAACAAAC<br>TT | Housekeeping gene |
| 66945              | Succinate dehydrogenase complex, subunit A     | SDHA          | CTTGAATGAGGCT<br>GACTGTG      | ATCACATAAGC<br>TGGTCCTGT        | Housekeeping gene |
| 15288              | Hydroxymethylbilane synthase                   | HMBS          | AAGGGCTTTTCTG<br>AGGCACC      | AGTTGCCCATC<br>TTTCATCACTG      | Housekeeping gene |
| 20296              | Macrophage Chemoattractant protein-1           | MCP-1         | TTAAAAACCTGGA<br>TCGGAACCAA   | GCATTAGCTTC<br>AGATTACGGG<br>T  | Chemokine         |
| 21926              | Tumor necrosis factor alpha                    | TNF- $\alpha$ | CATCTTCTCAAAA<br>TTCGAGTGACAA | TGGGAGTAGAC<br>AAGGTACAAC<br>CC | Cytokine          |
| 11475              | Alpha smooth muscle actin                      | Acta2         | CCAGCACCATGA<br>AGATCAAG      | TGGAAGGTAG<br>ACAGCGAAGC        | Pro-fibrotic gene |
| 21803              | Transforming growth factor beta                | TGF- $\beta$  | TGAGCGTCACTGG<br>AGTTGTACGG   | GGTTCATGTCA<br>TGGATGGTGC       | Pro-fibrotic gene |
| 21857              | Tissue inhibitor of metalloproteinase 1        | Timp 1        | CTTGGTTCCCTGG<br>CGTACTC      | ACCTGATCCGT<br>CCACAAACAG       | Pro-fibrotic gene |
| 12842              | Collagen type1 alfa 1                          | Col1A1        | GCTCCTCTTAGGG<br>GCCACT       | CCACGTCTCAC<br>CATTGGGG         | Pro-fibrotic gene |
