# Supplementary material for: Combined Therapy with a CCR2/CCR5 Antagonist and FGF21 Analogue Synergizes in Ameliorating Steatohepatitis and Fibrosis
Source: MDPI journal article supplement (doi:10.3390/ijms23126696), 2022-06-15
Supplement: s1 [file s1]

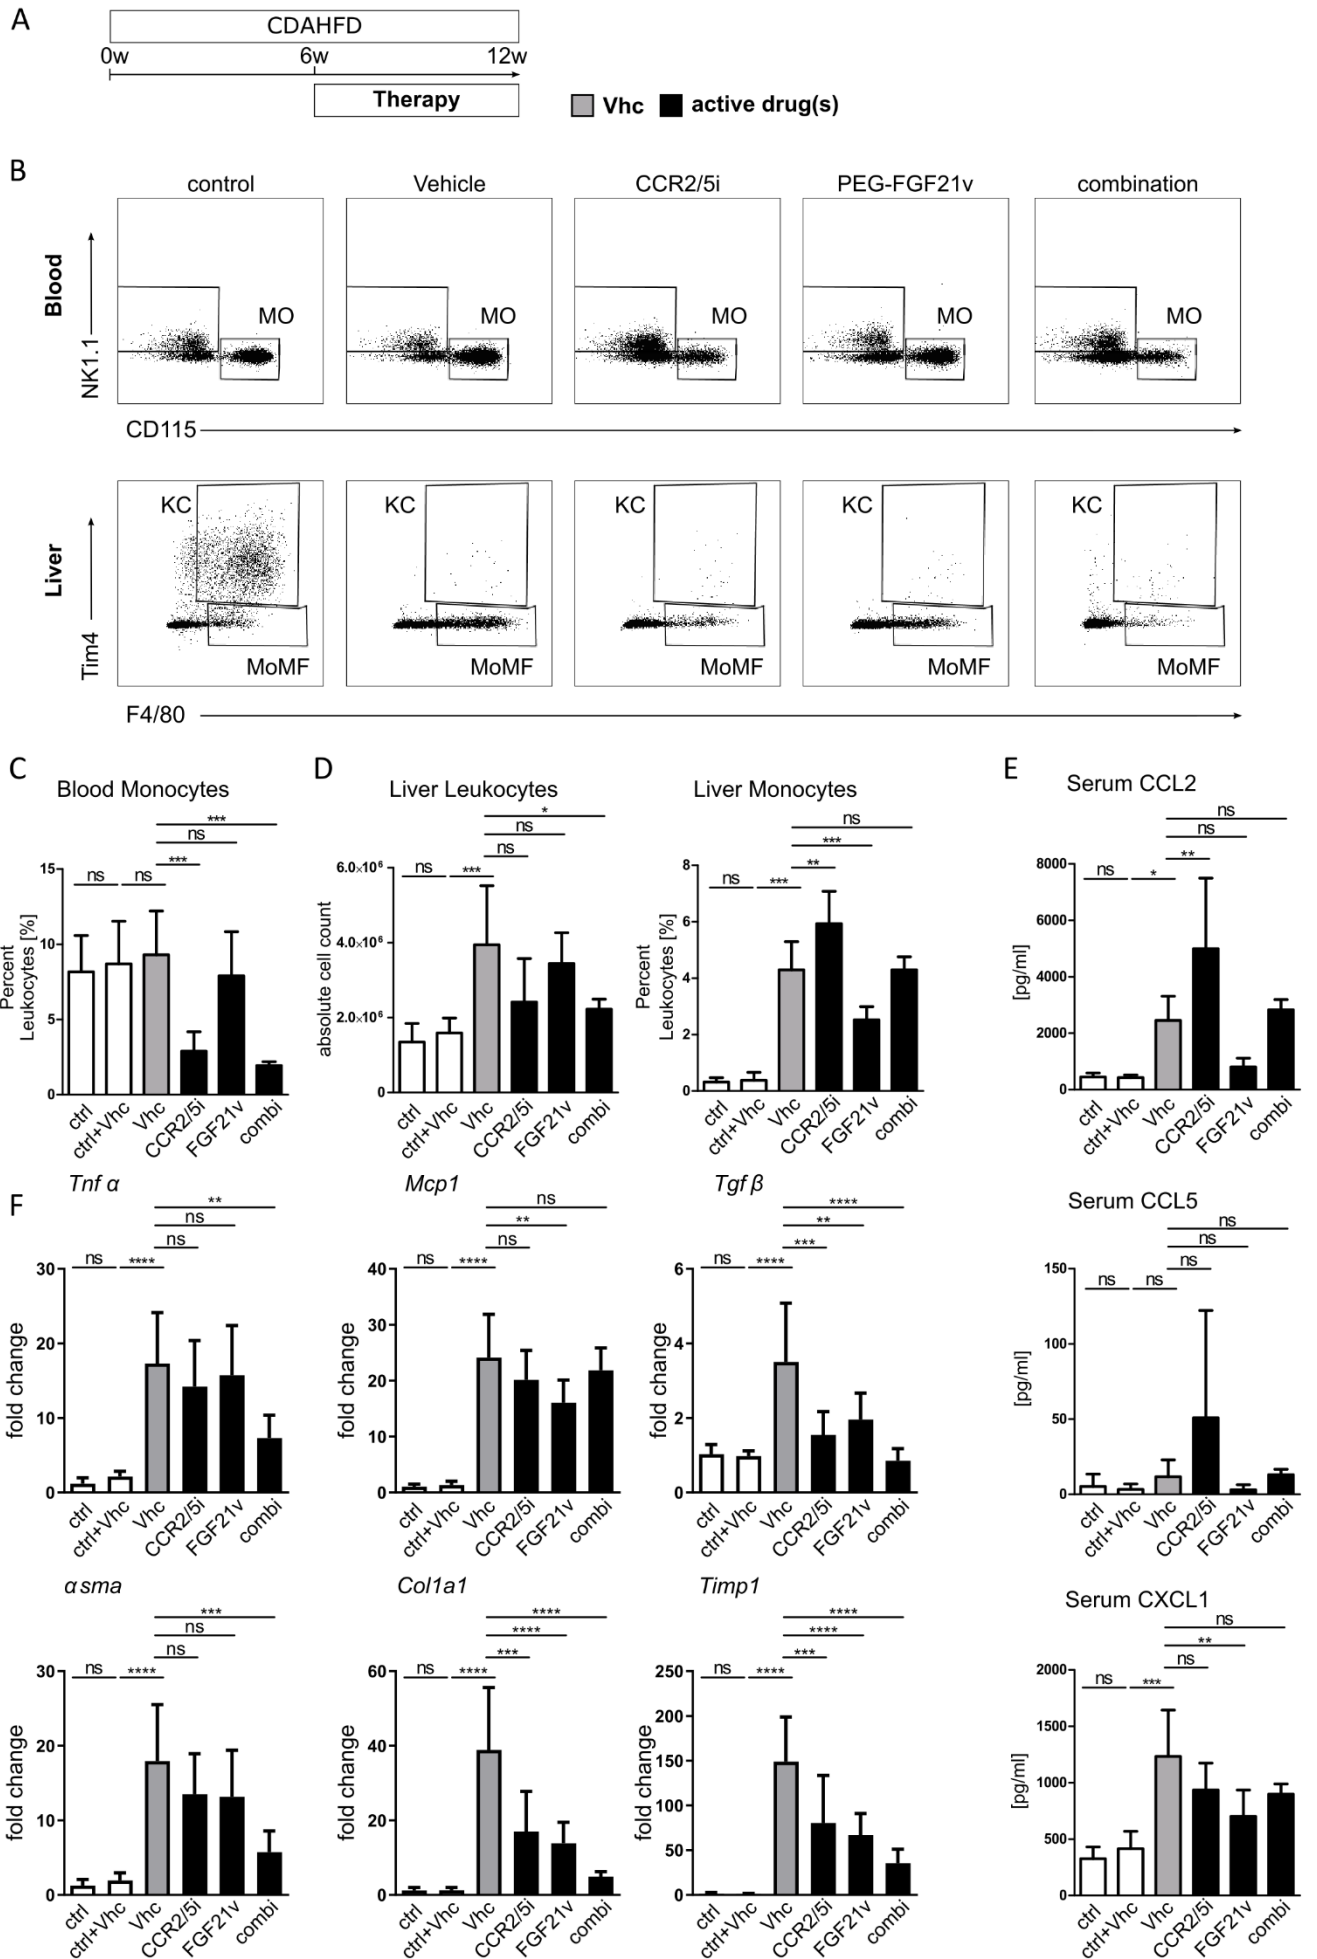

**Supplementary Figure S2.** Effects of combination treatment after long term treatment. **(A)** Chronic liver injury was induced over a total period of 12 weeks and effects of pharmacologic treatment with vehicle (Vhc), CCR2/CCR5 inhibitor (CCR2/5i) and/or PEG-FGF21 variant (FGF21v) was assessed after administration over the last 6 weeks of 12 weeks injury induction. **(B-D)** Representative FACS plots and corresponding quantification of blood (MO = monocytes) and liver immune cells (MoMF = monocyte-derived macrophages, KC = Kupffer cells and leukocytes). **(E)** Quantification of serum CCL2, CCL5 and CXCL1 levels by ELISA. **(F)** Fold change of gene expression levels from total liver tissue measured by RT-qPCR. All data are presented as mean SD (n = 6-8) \*P<0.05, \*\*P<0.01, \*\*\*P<0.001, \*\*\*\*P<0.0001 (one-way ANOVA with post-hoc testing).
