# Supplementary material for: Combined Therapy with a CCR2/CCR5 Antagonist and FGF21 Analogue Synergizes in Ameliorating Steatohepatitis and Fibrosis
Source: MDPI journal article supplement (doi:10.3390/ijms23126696), 2022-06-15
Supplement: s1 [file s1]

**Supplementary Table S2.** Univariate analysis according to the presence of advanced ( $\geq$ F3) Fibrosis

|                                         | $\leq$ F2 Fibrosis (n=73) | $\geq$ F3 Fibrosis (n=12) | P value   |
|-----------------------------------------|---------------------------|---------------------------|-----------|
| Age, years                              | 44,8 $\pm$ 11,7           | 55,8 $\pm$ 9,6            | 0.003**   |
| Type 2 diabetes, %                      | 26 (36)                   | 9 (75)                    | 0.011*    |
| ALT, U/l                                | 37 (31,5-62)              | 44 (32-70)                | 0.883     |
| AST, U/l                                | 26 (23-41)                | 36 (27-58)                | 0.130     |
| AST/ALT ratio                           | 0.73 $\pm$ 0.2            | 0.92 $\pm$ 0.27           | 0.005**   |
| GGT, U/l                                | 33 (23-56)                | 92 (48-145)               | 0.006**   |
| Thrombocytes, $\times 10^3/\mu\text{l}$ | 225 (198-270)             | 200 (171-277)             | 0.436     |
| Total cholesterol, mg/dl                | 174 (150-211)             | 153 (98-235)              | 0.351     |
| Triglycerides (mg/dl)                   | 174 (129-218)             | 230 (170-452)             | 0.264     |
| CCL2, pg/ml                             | 345,6 $\pm$ 102,4         | 469,7 $\pm$ 117,7         | <0.001*** |
| FGF-21, pg/ml                           | 260 (157-537)             | 674 (281-868)             | 0.07      |

\* Results are expressed as mean  $\pm$  SD or median (interquartile range) for continuous variables, depending on the normality of the distribution, and n (%) for categorical variables. \* P < 0.05; \*\* P < 0.01; \*\*\* P < 0.001.

ALT: Alanine Aminotransferase; AST: Aspartate Aminotransferase; CCL2: chemokine (C-C motif) ligand 2; FGF-2: fibroblast growth factor 21; GGT:  $\gamma$ -glutamyltransferase.
