# Supplementary material for: Combined Therapy with a CCR2/CCR5 Antagonist and FGF21 Analogue Synergizes in Ameliorating Steatohepatitis and Fibrosis
Source: MDPI journal article supplement (doi:10.3390/ijms23126696), 2022-06-15
Supplement: s1 [file s1]

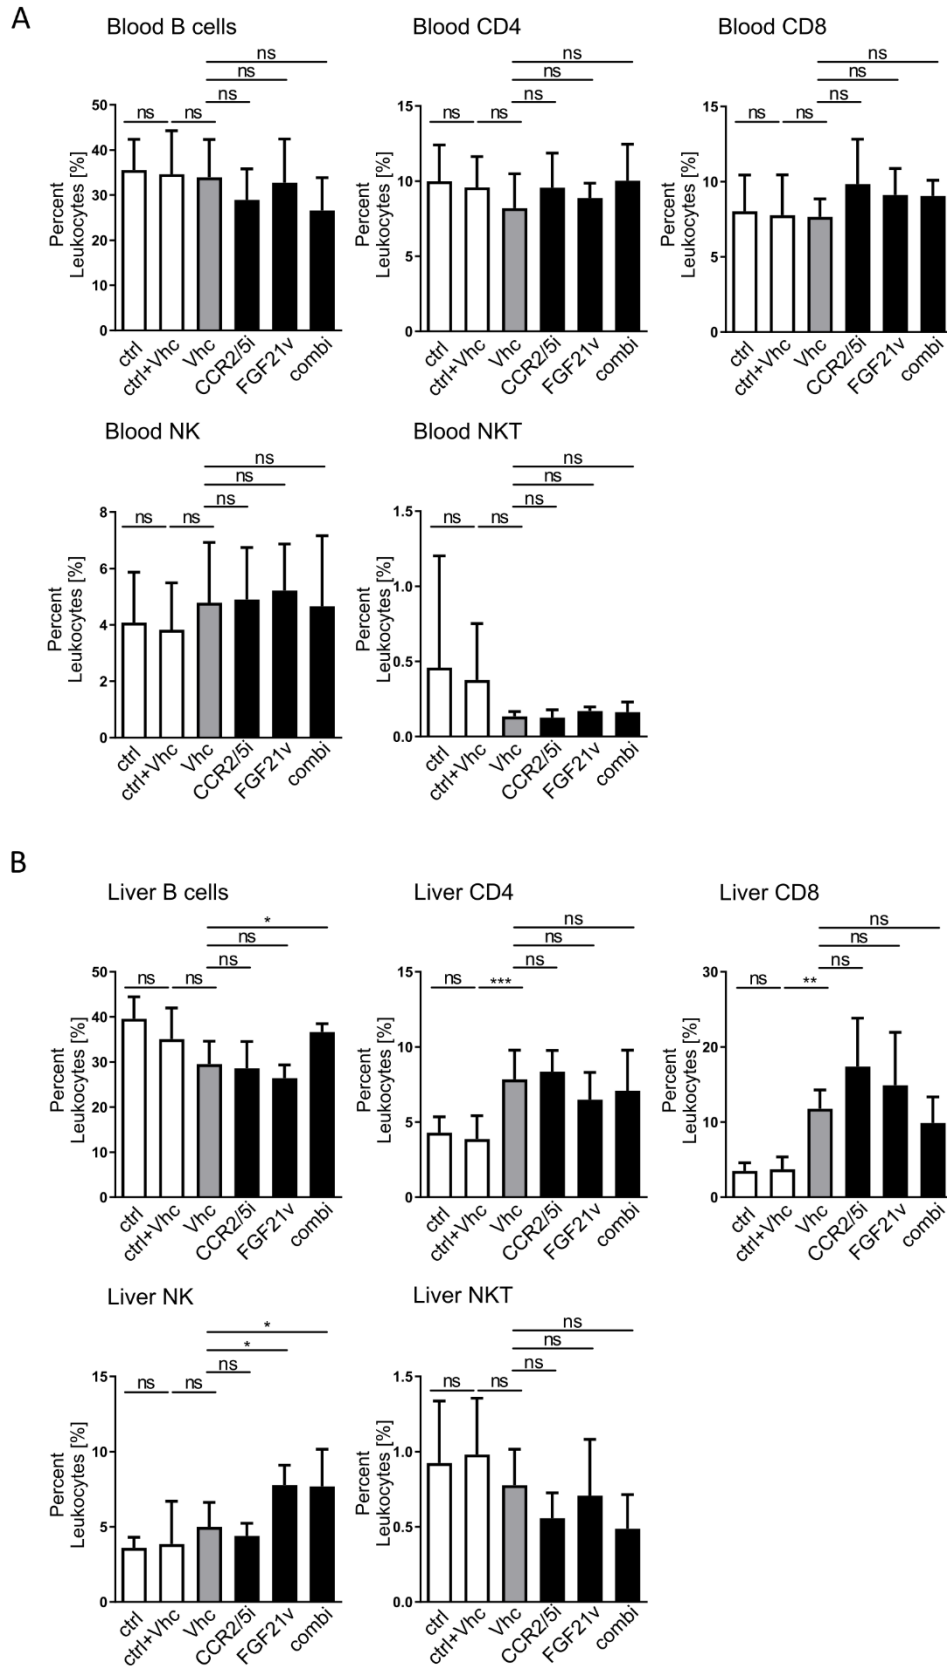

**Supplementary Figure S3.** Lymphocyte populations in long term chronic liver injury (**A-B**) Quantification of lymphocyte immune cell populations in blood (B cells, CD4+ T cells, CD8+ T cells, NK cells and NKT cells) and liver (B cells, CD4+ T cells, CD8+ T cells, NK cells and NKT cells). All data are

presented as mean SD (n = 6-8) \*P<0.05, \*\*P<0.01, \*\*\*P<0.001, \*\*\*\*P<0.0001 (one-way ANOVA with post-hoc testing).
