# Supplementary material for: Combined Therapy with a CCR2/CCR5 Antagonist and FGF21 Analogue Synergizes in Ameliorating Steatohepatitis and Fibrosis
Source: MDPI journal article supplement (doi:10.3390/ijms23126696), 2022-06-15
Supplement: s1 [file s1]

**Supplementary Table S1.** Histological features according to diagnosis

| Histological feature                            |                                         | NAFL<br>(n = 31) | NASH<br>(n = 54) |
|-------------------------------------------------|-----------------------------------------|------------------|------------------|
| Steatosis, n (%)                                | No (< 5%)                               | 0 (0)            | 0 (0)            |
|                                                 | Mild (5-33%)                            | 20 (64.5)        | 12 (23.1)        |
|                                                 | Moderate (33-66%)                       | 7 (22.6)         | 23 (44.2)        |
|                                                 | Severe ( $\geq$ 66%)                    | 4 (12.9)         | 17 (32.7)        |
| Lobular inflammation, n (%)<br>(per 200x field) | No foci                                 | 24 (77.4)        | 0 (0)            |
|                                                 | < 2 foci                                | 7 (22.6)         | 38 (73.1)        |
|                                                 | 2-4 foci                                | 0 (0)            | 14 (26.9)        |
|                                                 | > 4 foci                                | 0 (0)            | 0 (0)            |
| Ballooning, n (%)                               | None                                    | 29 (93.6)        | 0 (0)            |
|                                                 | Few ballooning cells                    | 1 (3.2)          | 30 (57.7)        |
|                                                 | Prominent ballooning                    | 1 (3.2)          | 22 (42.3)        |
| Fibrosis, n (%)                                 | Stage 0 (none)                          | 14 (45.2)        | 2 (3.7)          |
|                                                 | Stage 1 (perisinusoidal or periportal)  | 15 (48.4)        | 20 (37.0)        |
|                                                 | Stage 2 (perisinusoidal and periportal) | 2 (6.5)          | 20 (37.0)        |
|                                                 | Stage 3 (bridging fibrosis)             | 0 (0)            | 9 (16.7)         |
|                                                 | Stage 4 (cirrhosis)                     | 0 (0)            | 3 (5.6)          |

\* Data are shown in absolute numbers and % (in parenthesis).

NAFL: non-alcoholic fatty liver; NASH: non-alcoholic steatohepatitis
