# Supplementary material for: Combined Therapy with a CCR2/CCR5 Antagonist and FGF21 Analogue Synergizes in Ameliorating Steatohepatitis and Fibrosis
Source: MDPI journal article supplement (doi:10.3390/ijms23126696), 2022-06-15
Supplement: s1 [file s1]

**Supplementary Table S3.** Multivariate analysis according to the presence of advanced ( $\geq$ F3) Fibrosis

|                           | <b><math>\geq</math>F3 fibrosis (n=12) vs. <math>\leq</math>F2 fibrosis (n=73)</b> |               |                |
|---------------------------|------------------------------------------------------------------------------------|---------------|----------------|
|                           | <b>OR</b>                                                                          | <b>95% CI</b> | <b>P value</b> |
| Ratio AST/ALT             | 15.981                                                                             | 1.052-242.861 | 0.046*         |
| Type 2 diabetes, presence | 5.131                                                                              | 1.096-24.020  | 0.038*         |
| CCL2, pg/ml               | 1.007                                                                              | 1.001-1.013   | 0.017*         |

\* P < 0.05. ALT: alanine aminotransferase; AST: aspartate aminotransferase; CCL2: chemokine (C-C motif) ligand 2.
