# Supplementary material for: Combined Therapy with a CCR2/CCR5 Antagonist and FGF21 Analogue Synergizes in Ameliorating Steatohepatitis and Fibrosis
Source: MDPI journal article supplement (doi:10.3390/ijms23126696), 2022-06-15
Supplement: s1 [file s1]

**Supplementary Table S5.** Immune cell characterization by flow cytometry.

| Immune cells                        | Surface marker expression profile                                                                                                                                                                  |
|-------------------------------------|----------------------------------------------------------------------------------------------------------------------------------------------------------------------------------------------------|
| Leukocytes                          | CD45 <sup>+</sup>                                                                                                                                                                                  |
| Granulocytes                        | CD45 <sup>+</sup> , Ly6G <sup>high</sup> , Gr1 <sup>+</sup> ,<br>CD31 <sup>-</sup> , CD4 <sup>-</sup> , CD3 <sup>-</sup> , CD19 <sup>-</sup>                                                       |
| Monocytes                           | CD45 <sup>+</sup> , Ly6G <sup>-</sup> , CD11b <sup>high</sup> , F4/80 <sup>-</sup> , Gr1 <sup>+/-</sup> ,<br>CD31 <sup>-</sup> , CD4 <sup>-</sup> , CD3 <sup>-</sup> , CD19 <sup>-</sup>           |
| Monocyte-derived macrophages (MoMF) | CD45 <sup>+</sup> , Ly6G <sup>-</sup> , CD11b <sup>high</sup> , F4/80 <sup>+</sup> , Gr1 <sup>+/-</sup> ,<br>CD31 <sup>-</sup> , CD4 <sup>-</sup> , CD3 <sup>-</sup> , CD19 <sup>-</sup>           |
| Kupffer cells                       | CD45 <sup>+</sup> , Ly6G <sup>-</sup> , CD11b <sup>intermediate</sup> , F4/80 <sup>high</sup> , Tim4 <sup>+</sup> ,<br>CD31 <sup>-</sup> , CD4 <sup>-</sup> , CD3 <sup>-</sup> , CD19 <sup>-</sup> |
| B cells                             | CD45 <sup>+</sup> , Ly6G <sup>-</sup> , CD31 <sup>-</sup> , TCRb <sup>-</sup> , CD19 <sup>+</sup>                                                                                                  |
| T cells                             | CD45 <sup>+</sup> , Ly6G <sup>-</sup> , CD31 <sup>-</sup> , CD19 <sup>-</sup> , TCRβ <sup>+</sup>                                                                                                  |
| CD4 T cells                         | CD45 <sup>+</sup> , Ly6G <sup>-</sup> , CD31 <sup>-</sup> , CD19 <sup>-</sup> , TCRβ <sup>+</sup> , CD4 <sup>+</sup>                                                                               |
| CD8 T cells                         | CD45 <sup>+</sup> , Ly6G <sup>-</sup> , CD31 <sup>-</sup> , CD19 <sup>-</sup> , TCRβ <sup>+</sup> , CD8 <sup>+</sup>                                                                               |
| NK cells                            | CD45 <sup>+</sup> , Ly6G <sup>-</sup> , CD31 <sup>-</sup> , NK1.1 <sup>+</sup> , TCRβ <sup>-</sup>                                                                                                 |
| NKT cells                           | CD45 <sup>+</sup> , Ly6G <sup>-</sup> , CD31 <sup>-</sup> , NK1.1 <sup>+</sup> , TCRβ <sup>+</sup>                                                                                                 |
